# Supplementary material for: IFN-λ1 Displays Various Levels of Antiviral Activity In Vitro in a Select Panel of RNA Viruses
Source: MDPI journal article supplement (doi:10.3390/v13081602), 2021-08-12
Supplement: s1 [file s1]

**Table S1: Primers and probes used to quantify ISG expression.**

| Gene          | Primer name   | Sequence 5'-3'                       | Product length, bp |
|---------------|---------------|--------------------------------------|--------------------|
| <i>Rig-1</i>  | qh_RIG1_F1940 | GAGCACTTGTGGACGCTTTA                 | 133                |
|               | qh_RIG1_R2053 | ATACACTTCTGTGCCGGGAG                 |                    |
|               | qh_RIG1_O2002 | ROX-CCTGGCATATTGACTGGACGTGGC-BHQ2    |                    |
| <i>OAS-1</i>  | qh_OAS1_F     | CCAAGGTGGTAAAGGGTGGCT                | 200                |
|               | qh_OAS1_R     | CTGGACCTCAAACCTTCACGGAAA             |                    |
|               | qh_OAS1_O     | Cy3-AGGCCGATCTGACGCTGACCTGGTTGT-BHQ2 |                    |
| <i>SOCS-1</i> | qh_SOCS-1_F   | GGAGCATGCGCGAGAGC                    | 149                |
|               | qh_SOCS-1_R   | CCTGGTTGTGTGCTACCATCC                |                    |
|               | qh_SOCS-1_O   | ROX-CCCTCCGGCTGGCCCCCTTCTGTA-BHQ2    |                    |
| <i>PKR</i>    | q_hEIF2AK2_F  | GAAAGCGAACAAGGAGTAAGGGA              | 175                |
|               | qh EIF2AK2_R  | CCATCCCGTAGGTCTGTGAAA                |                    |
|               | qh EIF2AK2_O  | Cy5-AGCCCCAAAGCGTAGAGGTCCACTTCC-BHQ3 |                    |
| <i>MxA</i>    | NS02F_hMxA    | GAGACAATCGTGAAACAGCAAATCA            | 105                |
|               | NS02R_hMxA    | TATCGAAACATCTGTGAAAGCAAGC            |                    |
|               | NS02P.a_hMxA  | FAM-CACTGGAAGAGCCGGCTGTGGATATG-BHQ1  |                    |

**Table S2: Primers and probes used to quantify viral RNA replication.**

| Virus | Viral gene            | Primer name  | Sequence 5'-3'                         | Reference |
|-------|-----------------------|--------------|----------------------------------------|-----------|
| IVA   | <i>M-protein gene</i> | InfA Forward | GACCRATCCTGTACCTCTGAC                  | [S1]      |
|       |                       | InfA Reverse | AGGGCATTYTGGACAAKCGTCTA                |           |
|       |                       | InfA Probe   | FAM-TGCAGTCCTGCGTCACTGGGCACG-BHQ1      |           |
| AdV   | <i>hexon</i>          | Adeno-F      | GCCACGGTGGGGTTTCTAAACTT                | [S2]      |
|       |                       | Adeno-R      | GCCCCAGTGGTCTTACATGCACATC              |           |
|       |                       | Adeno-O      | FAM-TGCACCAGACCCGGGCTCAGGTACTCCGA-BHQ1 |           |

S1) World Health Organization, 2009. CDC protocol of real-time RT-PCR for swine influenza (H1N1). World Health Organization, Geneva, Switzerland. [http://www.who.int/csr/resources/publications/swine-flu/CDCrealtimeRTPCRprotocol\\_20090428.pdf](http://www.who.int/csr/resources/publications/swine-flu/CDCrealtimeRTPCRprotocol_20090428.pdf). Accessed 8 May 2009.

S2) Heim, A., Ebnet, C., Harste, G., & Pring-Åkerblom, P. (2003). Rapid and quantitative detection of human adenovirus DNA by real-time PCR. *Journal of medical virology*, 70(2), 228-239.

**Table S3: Statistical analysis of qPCR data (dCt) reflecting reproduction kinetics of IVA and AdV.**

|     |                                     | 3 hpi                  | 8 hpi                  | 18 hpi                 | 24 hpi                  |
|-----|-------------------------------------|------------------------|------------------------|------------------------|-------------------------|
| IVA | <b>P value</b>                      | <b>0,0034</b>          | <b>0,0055</b>          | <b>0,0211</b>          | <b>0,0110</b>           |
|     | <b>Significantly different?</b>     | Yes (**)               | Yes (**)               | Yes (*)                | Yes (*)                 |
|     | <b>Mean ± SEM of w/o treatment</b>  | 10,59 ± 0,08145<br>N=3 | 0,1000 ± 0,6950<br>N=3 | -1,217 ± 0,3075<br>N=3 | -1,247 ± 0,5948<br>N=3  |
|     | <b>Mean ± SEM of IFN-I500 ng/ml</b> | 13,02 ± 0,3820<br>N=3  | 3,917 ± 0,06888<br>N=3 | 0,7133 ± 0,4240<br>N=3 | 1,700 ± 0,2821<br>N=3   |
|     | <b>95% confidence interval</b>      | 1,349 to 3,518         | 1,878 to 5,756         | 0,4759 to 3,384        | 1,119 to 4,774          |
|     | <b>R square</b>                     | 0,9066                 | 0,8819                 | 0,7725                 | 0,8336                  |
| AdV | <b>P value</b>                      | <b>0,6224</b>          | <b>0,5077</b>          | <b>0,6013</b>          | <b>0,2114</b>           |
|     | <b>Significantly different?</b>     | No (ns)                | No (ns)                | No (ns)                | No (ns)                 |
|     | <b>Mean ± SEM of w/o treatment</b>  | 13,71 ± 0,1010<br>N=3  | 14,53 ± 1,079<br>N=3   | 1,200 ± 0,3750<br>N=3  | -1,983 ± 0,9644<br>N=3  |
|     | <b>Mean ± SEM of IFN-I500 ng/ml</b> | 13,98 ± 0,5062<br>N=3  | 15,67 ± 1,123<br>N=3   | 1,420 ± 0,1007<br>N=3  | -0,5067 ± 0,2390<br>N=3 |

|  |                         |                 |                 |                  |                 |
|--|-------------------------|-----------------|-----------------|------------------|-----------------|
|  | 95% confidence interval | -1,158 to 1,708 | -3,193 to 5,456 | -0,8581 to 1,298 | -1,282 to 4,235 |
|  | R square                | 0,06626         | 0,1166          | 0,07429          | 0,3557          |

N — sample size; NS — no significant differences; \*\* — P Value < 0.01; \* — P Value < 0.05

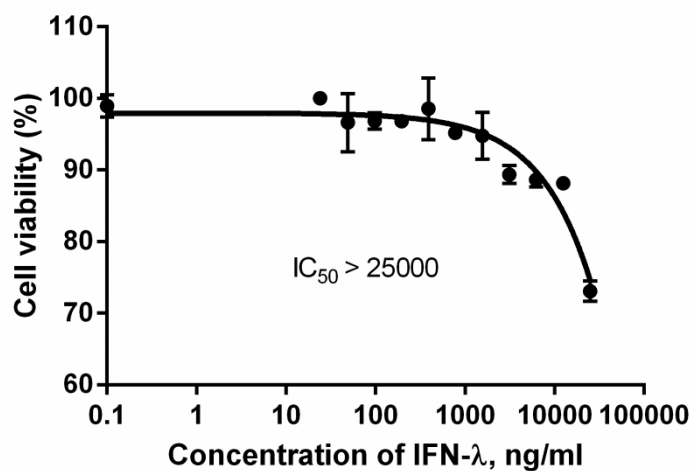

(a) A549 cells

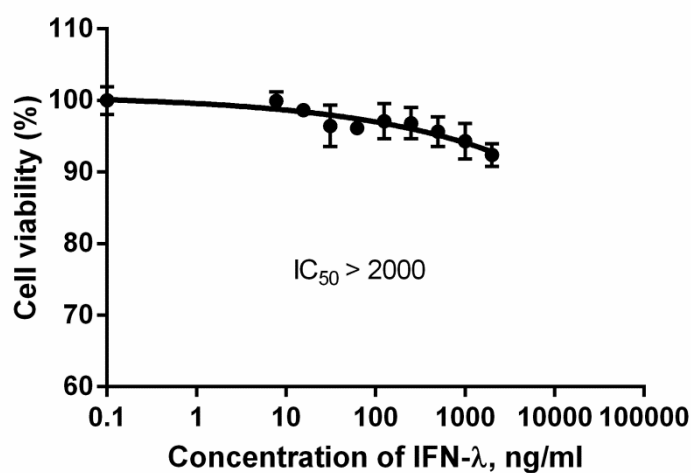

(b) Vero cells

**Figure S1. Dose-dependent cytotoxicity of IFN-λ1 in A549 (a) and Vero (b) cells after 24 hrs of exposure (MTT assay).** Cells were seeded into 96-well plates and allowed to attach overnight. Afterwards, media were replaced with 100 µl of IFN-λ1 at different concentrations and incubated for 24 hrs. After incubation, 10 µl of MTT (5 mg/ml in PBS) was added, with further incubation for 2 hrs. Supernatants were subsequently removed; cells and MTT crystals were dissolved in DMSO. The amount of blue formazan generated was then determined (OD<sub>570 nm</sub>). The results are calculated as percent viability in relation to untreated cells. Data are presented as mean ± SD for four biological replicates.

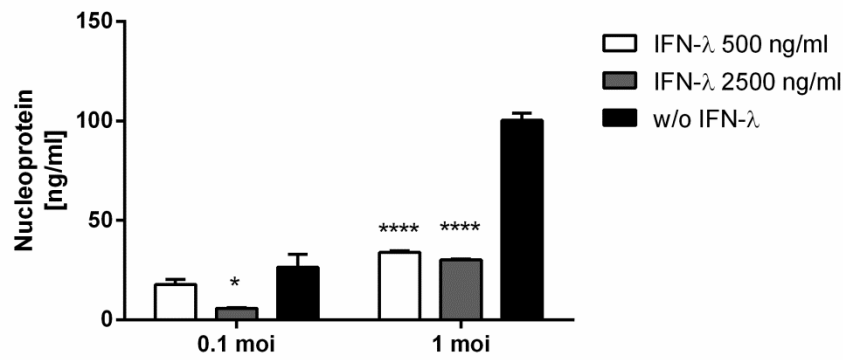

(a) preventive

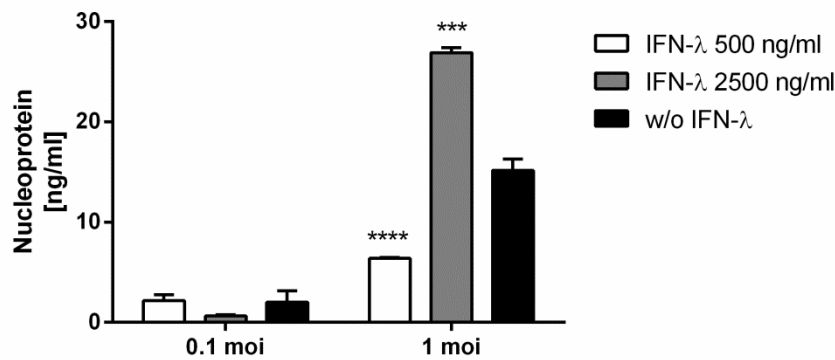

(b) therapeutic

Figure S2: Replication of A/California/07/09 (H1N1pdm09) in A549 cells in response to IFN-λ1 treatment: (a) 'preventive' treatment, (b) 'therapeutic' treatment.

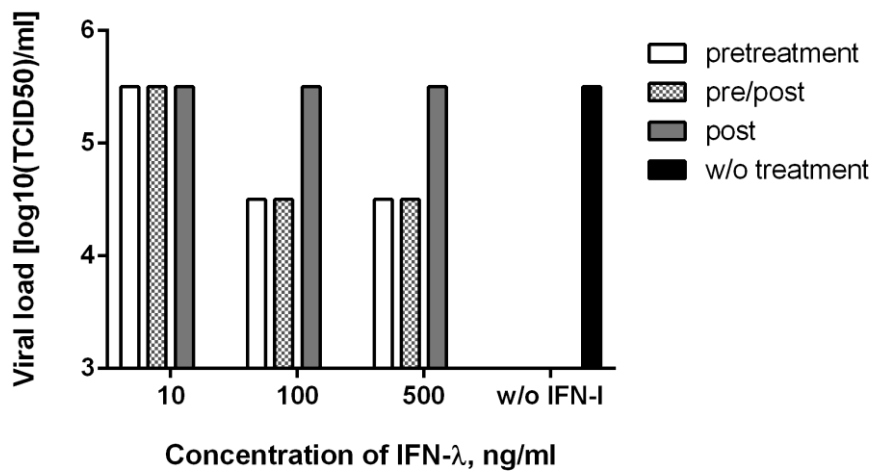

Figure S3: Inhibition of influenza A virus replication. Vero cells were infected with A/PR/8/34 (H1N1) without subsequent addition of trypsin (single-cycle IVA replication). Viral titers were determined at 72 hpi.

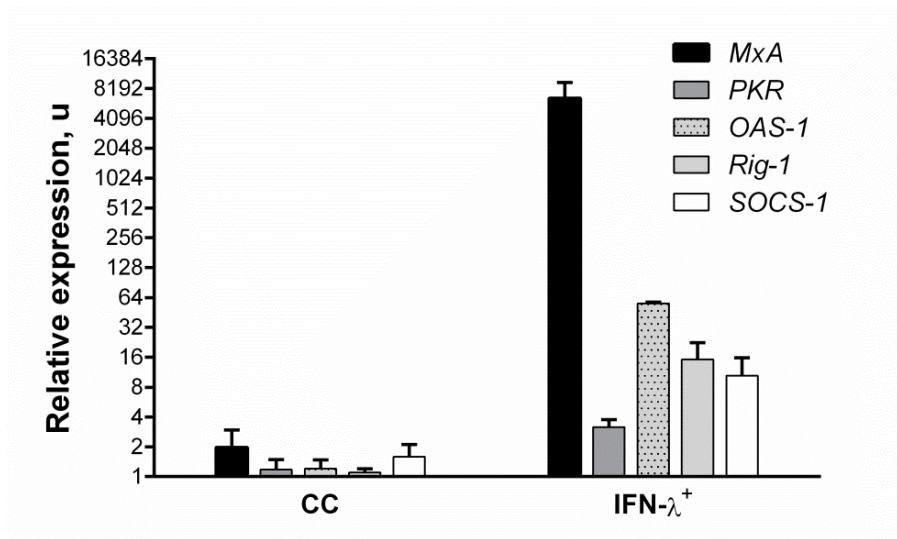

Figure S4: Interferon stimulated gene expression in Vero cells in response to IFN-λ1 stimulation.

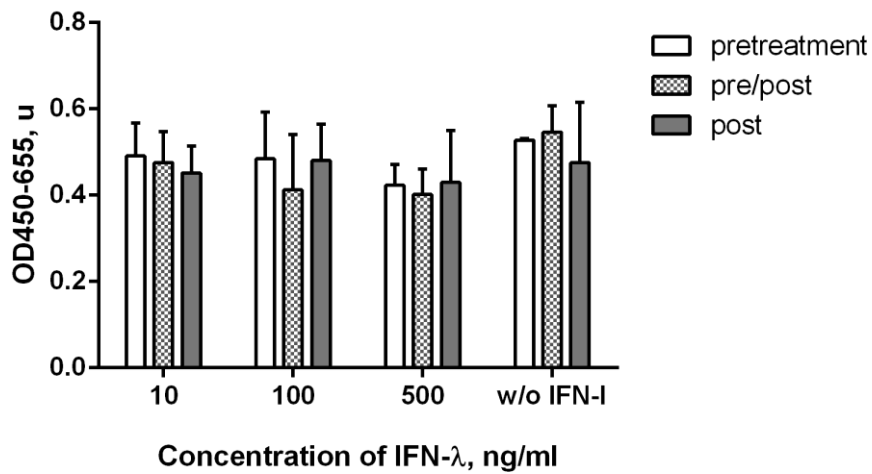

Figure S5: Replication of AdV (serotype 5) in A549 cells in response to IFN-λ1 treatment. Viral antigen was measured at 24 hpi by In-Cell ELISA with anti-hexon antibodies.
